# Supplementary material for: Clinical and immunologic impact of short-course enzalutamide alone and with immunotherapy in non-metastatic castration sensitive prostate cancer
Source: HighWire-hosted journal article supplement (doi:10.1136/jitc-2020-001556), 2021-03-01
Supplement: jitc-2020-001556supp003_data_supplement.pdf [file jitc-2020-001556supp003_data_supplement.pdf]

**Supplemental Figure 2. Gating strategy to identify 123 peripheral immune cell subsets**

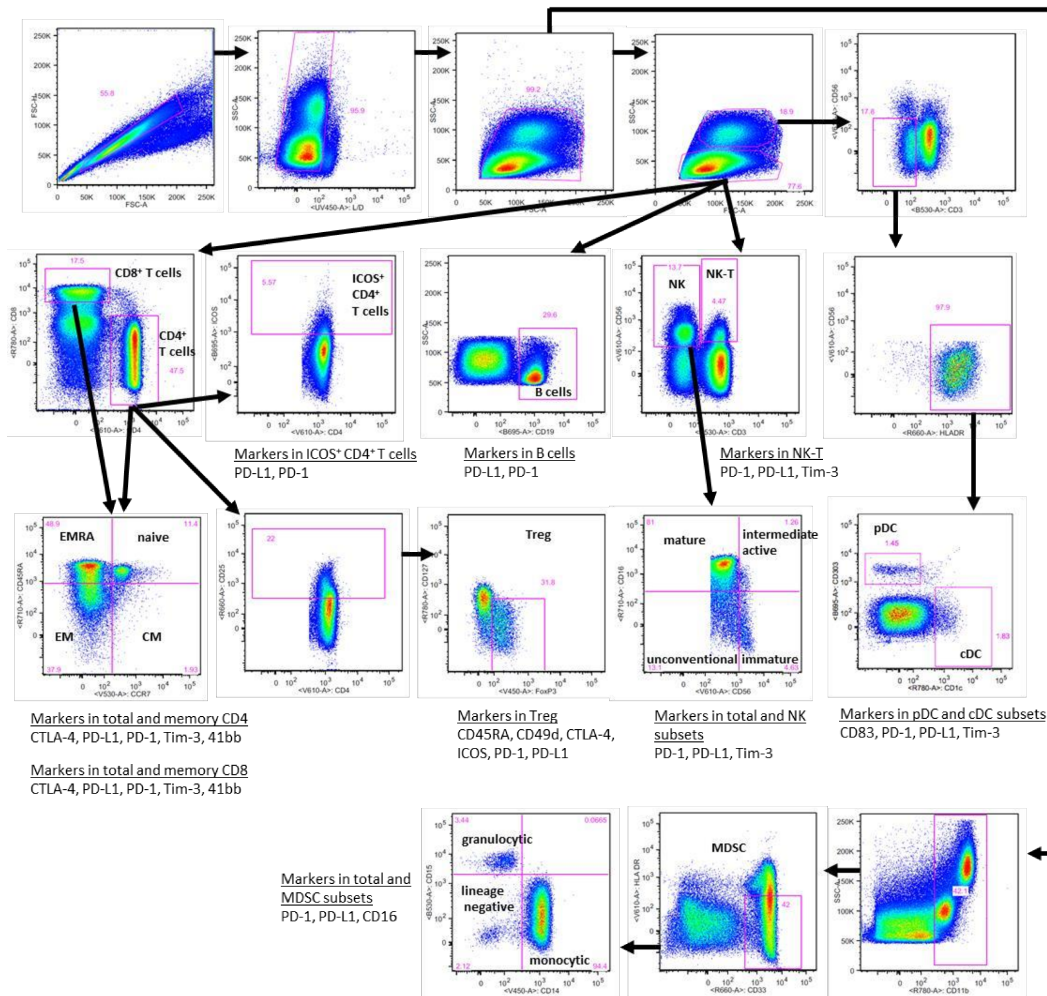

Supplemental Figure 2: Gating strategy to identify 123 peripheral immune cell subsets using four immune flow cytometry panels. Classic immune cell types included CD4+ T cells, CD8+ T cells, T regulatory (Treg) T cells, B cells, natural killer (NK) and NK-T cells, conventional dendritic cells (cDCs), plasmacytoid DCs (pDCs) and myeloid derived suppressor cells (MDSCs).
