# Supplementary material for: Clinical and immunologic impact of short-course enzalutamide alone and with immunotherapy in non-metastatic castration sensitive prostate cancer
Source: HighWire-hosted journal article supplement (doi:10.1136/jitc-2020-001556), 2021-03-01
Supplement: jitc-2020-001556supp004_data_supplement.pdf [file jitc-2020-001556supp004_data_supplement.pdf]

### Supplemental Figure 3: Representative flow cytometry plots of notable subsets that change with therapy

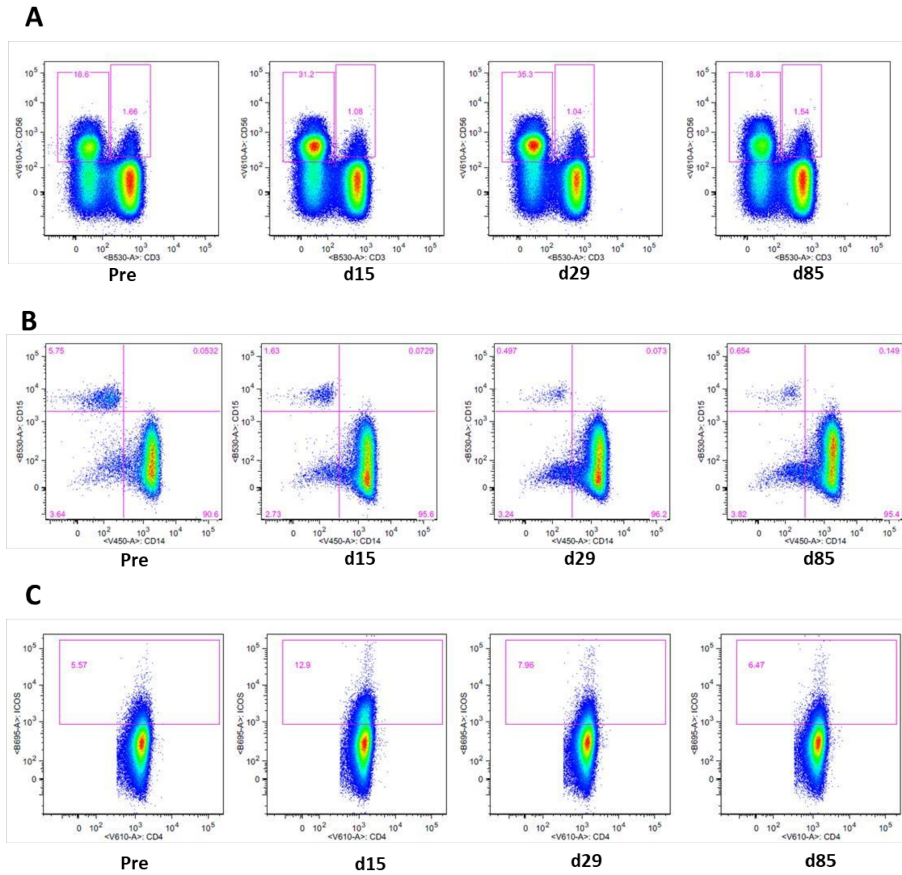

Supplemental Figure 3: Representative flow cytometry plots of notable subsets changing significantly with therapy. (A) An increase in NK cells and (B) decrease in granulocytic MDSC (CD15+ CD14-) in a patient treated with Enzalutamide alone. (C) An increase in ICOS+ CD4 in a patient treated with Enzalutamide + Vaccine.
